# Supplementary material for: Orally administrable polyphenol-based nanoparticles achieve anti-inflammation and antitumor treatment of colon diseases
Source: Royal Society of Chemistry journal article supplement (doi:10.1039/d2bm00540a), 2022-01-01
Supplement: d2bm00540a1.pdf [file d2bm00540a1.pdf]

## Supplementary information

### **Orally administrable polyphenol-based nanoparticle achieves anti-inflammation and antitumor treatment of colon diseases**

Zhicheng Le <sup>a</sup>, Zepeng He <sup>a</sup>, Hong Liu <sup>a</sup>, Jia Ke <sup>b</sup>, Lixin Liu <sup>a</sup>, Zhijia Liu <sup>a,\*</sup>, Yongming Chen <sup>a,\*</sup>

<sup>a</sup> *School of Materials Science and Engineering, Key Laboratory for Polymeric Composite and Functional Materials of Ministry of Education, Sun Yat-sen University, Guangzhou 510006, China*

<sup>b</sup> *Department of Colorectal Surgery, The Sixth Affiliated Hospital, Sun Yat-sen University, Guangzhou 510655, China*

*\* Corresponding authors*

*E-mail addresses: liuzhj9@mail.sysu.edu.cn (Zhijia Liu), chenym35@mail.sysu.edu.cn (Yongming Chen).*

## 1. Supplementary methods

### 1.1. In vitro cytotoxicity assay

The cytotoxic activity of tannic acid, TPGS, and TTNP against HT-29 cells or RAW 264.7 cells was tested by the standard MTT assay. Briefly, HT-29 cells or RAW 264.7 cells at an initial density of  $1 \times 10^4$  cells/well were seeded into 96-well plates and incubated for 24 h, respectively. Then, the culture media were replaced with fresh media containing various samples at an equal tannic acid dose of 10  $\mu\text{g/mL}$ , respectively. After incubation of 24 h, relative cell viability was tested by our previously described methods.<sup>1</sup>

To evaluate in vitro anticancer effect of DTX-TTNP. HT-29 cells at an initial density of  $1 \times 10^4$  cells/well were seeded into 96-well plates and incubated for 24 h. Then culture media were replaced with fresh media containing free DTX or DTX-TTNP at equal DTX doses of 0.01, 0.04, 0.2, 1, 5, or 25  $\mu\text{g/mL}$ , respectively. After separate incubation for another 24 h or 48 h, cell cytotoxicity was tested by the same procedures as described above.

### 1.2. In situ single-pass intestinal perfusion (SPIP)

In situ SPIP experiment was performed as previously described with some modifications.<sup>2</sup> Briefly, male Sprague-Dawley (SD) rats (from the Animal Experimental Centre, Sun Yat-sen University) were anesthetized and placed in prewarmed plates, then the abdomen opened along the midline, and different intestinal segments including duodenum, jejunum, ileum or colon were carefully exposed in 10 cm length. After washing with prewarmed saline, intestinal segments were equilibrated with Krebs Ringer's buffer containing DTX or DTX-TTNP (10  $\mu\text{g/mL}$  of DTX) for 45 min and then continue with the perfusion process for 60 min. The flow rate of perfusate was set at 0.2 mL/min, and donor and receptor vials were replaced and weighted per 15 min. Afterward, the length and radius of each tested intestinal segment were recorded, and absorption rate ( $K_a$ ) and apparent permeability ( $P_{app}$ ) were calculated as the following equations 1 and 2:

$$K_a = \left(1 - \frac{C_{out}}{C_{in}} \cdot \frac{V_{out}}{V_{in}}\right) \cdot \frac{Q}{\pi r^2 l} \quad (1)$$

$$P_{app} = \frac{-Q \cdot \ln\left(\frac{C_{out}}{C_{in}} \cdot \frac{V_{out}}{V_{in}}\right)}{2\pi r l} \quad (2)$$

where  $C_{out}$  and  $C_{in}$  are DTX concentration in the receptor and donor vial, respectively,  $V_{out}$  and  $V_{in}$  are the volume of perfusate in the receptor and donor vial, respectively,  $Q$  is the flow rate of perfusate,  $r$  and  $l$  are the radius and length of the tested intestinal segment, respectively.

## 2. Supplementary figures

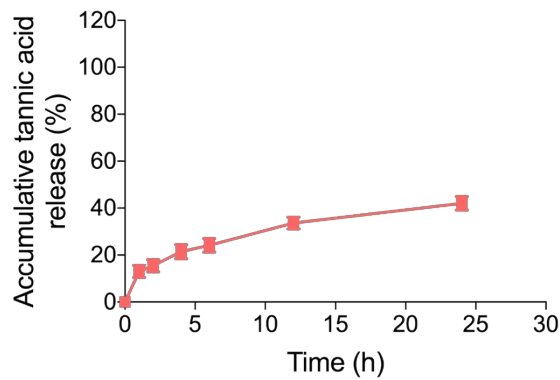

**Fig. S1** In vitro accumulative release profiles of tannic acid from DTX-TTNP in pH 7.4.

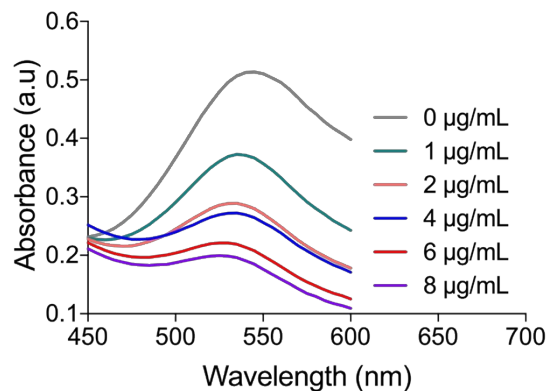

**Fig. S2** UV-visible spectra of DPPH radicals after treatment with TTNP at various tannic acid concentrations.

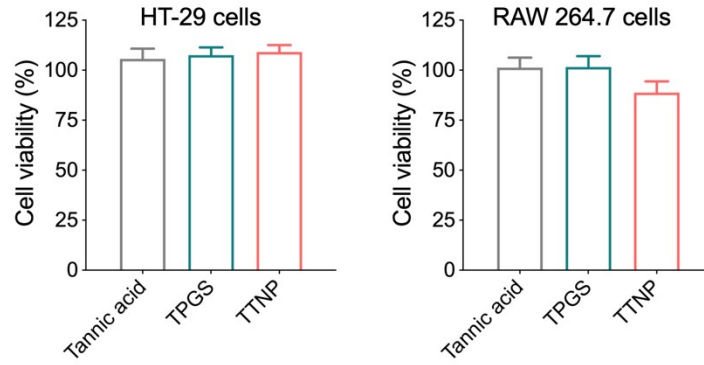

**Fig. S3** In vitro cytotoxicity of HT-29 cells and RAW 264.7 cells after co-incubation with tannic acid, TPGS, or TTNP for 24 h, respectively. Tannic acid was 10  $\mu\text{g}/\text{mL}$  ( $n = 3$ ).

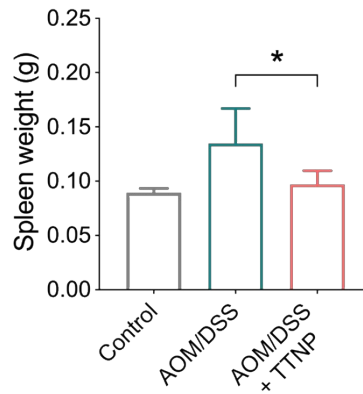

**Fig. S4** Spleen weight of mice at the end of prevention therapy study (day 49).  $*P < 0.05$  ( $n = 5$ ).

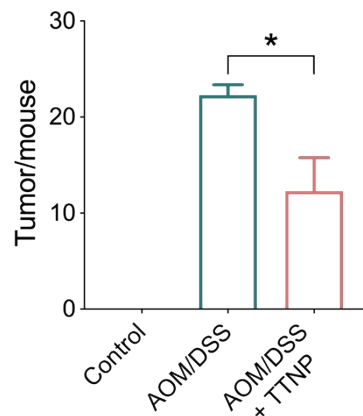

**Fig. S5** Colorectal tumor numbers of mice at the end of prevention study (day 49).  $*P < 0.05$  ( $n = 5$ ).

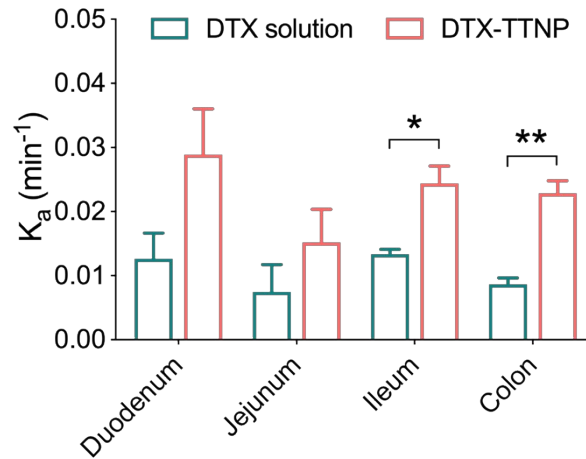

**Fig. S6**  $K_a$  values of duodenum, jejunum, ileum and colon, as measured by in situ single-pass intestinal perfusion experiment. \* $P < 0.05$ , \*\* $P < 0.01$  ( $n = 3$ ).

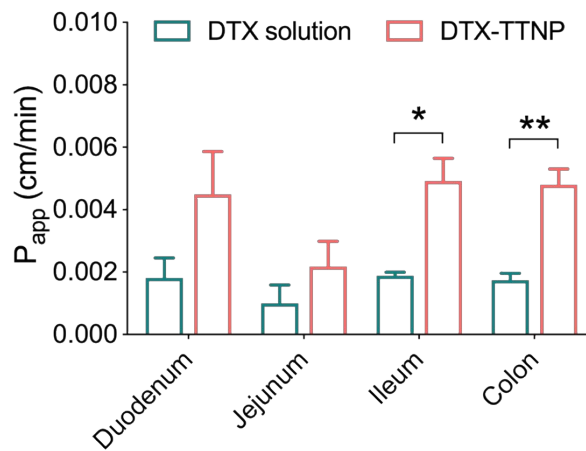

**Fig. S7**  $P_{app}$  values of duodenum, jejunum, ileum and colon, as measured by in situ single-pass intestinal perfusion experiment. \* $P < 0.05$ , \*\* $P < 0.01$  ( $n = 3$ ).

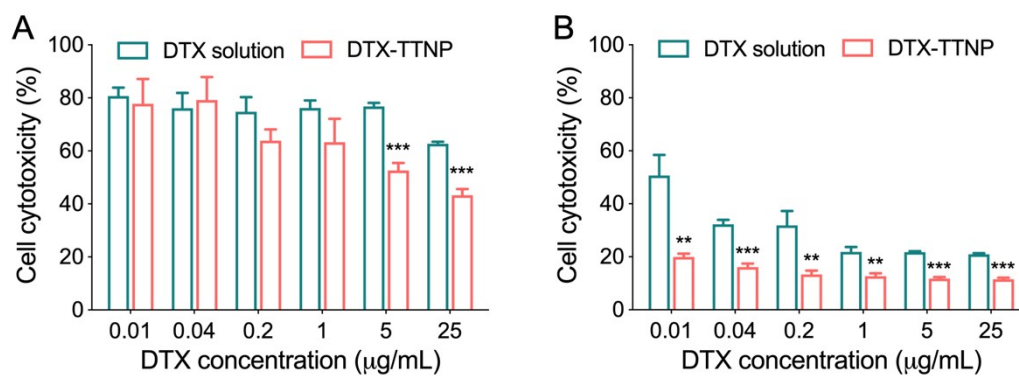

**Fig. S8** (A, B) In vitro cytotoxicity after HT-29 cells treated with various concentrations of DTX or DTX-TTNP for 24 h (A) or 48 h (B), respectively, \*\* $p < 0.01$ , \*\*\* $p < 0.001$  ( $n = 3$ ).

## References

1. Z. Le, Z. Liu, L. Sun, L. Liu and Y. Chen, *ACS Appl. Bio Mater.*, 2020, **3**, 5202–5212.
2. D. Zhang, X. Pan, S. Wang, Y. Zhai, J. Guan, Q. Fu, X. Hao, W. Qi, Y. Wang, H. Lian, X. Liu, Y. Wang, Y. Sun, Z. He and J. Sun, *Mol. Pharm.*, 2015, **12**, 2337–2351.
